# Supplementary material for: MCP-1/MCPIP-1 Signaling Modulates the Effects of IL-1β in Renal Cell Carcinoma through ER Stress-Mediated Apoptosis
Source: Int J Mol Sci. 2019 Dec 3;20(23):6101. doi: 10.3390/ijms20236101 (PMC6928829; doi:10.3390/ijms20236101)
Supplement: Supplementary file 1 [file ijms-20-06101-s001.pdf]

## Supplementary Material

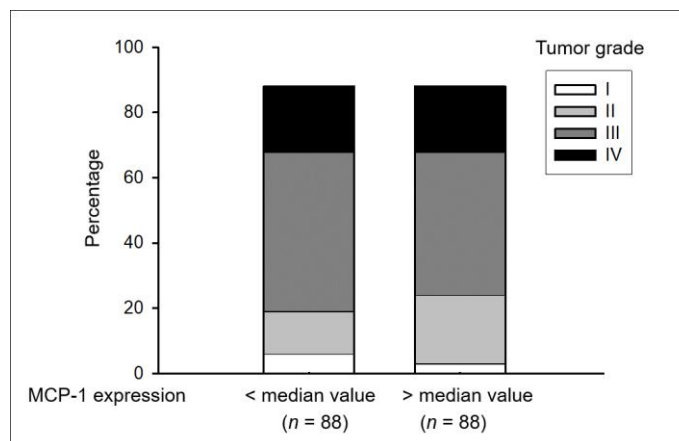

**Supplementary Figure S1.** Statistical analysis of Fuhrman grade of patients in the MCP-1-low expression group (< median value,  $n = 88$ ) compared with patients in the MCP-1-high expression group (> median value,  $n = 88$ ). Statistical analysis was performed using Mann-Whitney nonparametric U-test.

**Table S1 Clinicopathological features of 75 patients in ccRCC tissue microarray**

| Variables             | No. of cases | Percentage |
|-----------------------|--------------|------------|
| Age (years)           |              |            |
| Mean                  | 59           |            |
| Range                 | 29-82        |            |
| Gender                |              |            |
| Male                  | 100          | 67%        |
| Female                | 50           | 33%        |
| Pathological type     |              |            |
| ccRCC                 | 75           | 50%        |
| Non-tumor             | 75           | 50%        |
| TNM stage             |              |            |
| I + II                | 62           | 83%        |
| III + IV              | 13           | 17%        |
| Lymph node metastasis |              |            |
| Present               | 5            | 7%         |
| Absent                | 69           | 93%        |
| Distance metastasis   |              |            |
| Present               | 1            | 1%         |
| Absent                | 74           | 99%        |

**Supplementary Table S2 Comparison between early and late stage of ccRCC based on MCP-1 and MCP-1P immunoreactivities using the chi-square test**

|           | No. of cases | MCP-1 in tumor tissue |         | MCP-1P in tumor tissue |         |
|-----------|--------------|-----------------------|---------|------------------------|---------|
|           |              | IHC score             | P-value | IHC score              | P-value |
| TNM stage |              |                       |         |                        |         |
| I         | 37           | 1.82 (0.76)           |         | 1.29 (0.89)            |         |
| II + III  | 38           | 1.86 (0.78)           | 0.992   | 1.52 (0.90)            | 0.987   |

**Supplementary Table S3. Clinical pathologic characteristics of clear cell renal cell carcinoma patients.**

| Characteristics | No. of patients ( <i>n</i> = 24) |
|-----------------|----------------------------------|
| Stage           |                                  |
| I               | 16                               |
| II              | 0                                |
| III             | 7                                |
| IV              | 1                                |
| TNM             |                                  |
| T4              | 1                                |
| T3a + T3b       | 7                                |
| T2              | 0                                |
| T1a + T1b       | 16                               |
| N1              | 2                                |
| N0              | 22                               |
| M1              | 3                                |
| M0              | 21                               |

**Supplementary Table S4 Primer sequences for qPCR**

| Primers for qPCR |   |                           |
|------------------|---|---------------------------|
| Gene symbol      |   | Sequences                 |
| ZC3H12A          | F | 5' atcgatgggagcaacgtg 3'  |
|                  | R | 5' ccgctccagaaaccagttc 3' |
| b-actin          | F | 5' ccaaccgcgagaagatga 3'  |
|                  | R | 5' ccagaggcgtacagggatag3' |
